# Supplementary material for: Disease-Specific Expression of Conjunctiva Associated Lymphoid Tissue (CALT) in Mouse Models of Dry Eye Disease and Ocular Allergy
Source: MDPI journal article supplement (doi:10.3390/ijms21207514), 2020-10-12
Supplement: s1 [file s1]

## Supplemental information

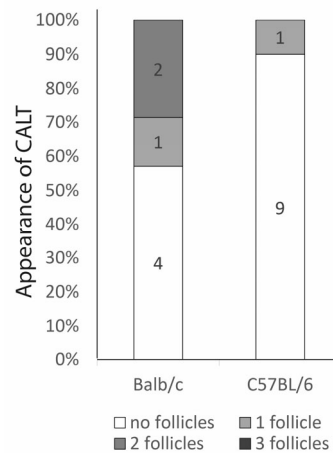

**Supplemental Figure S1: Appearance of CALT in naïve Balb/C and naïve C57BL/6 mice.**

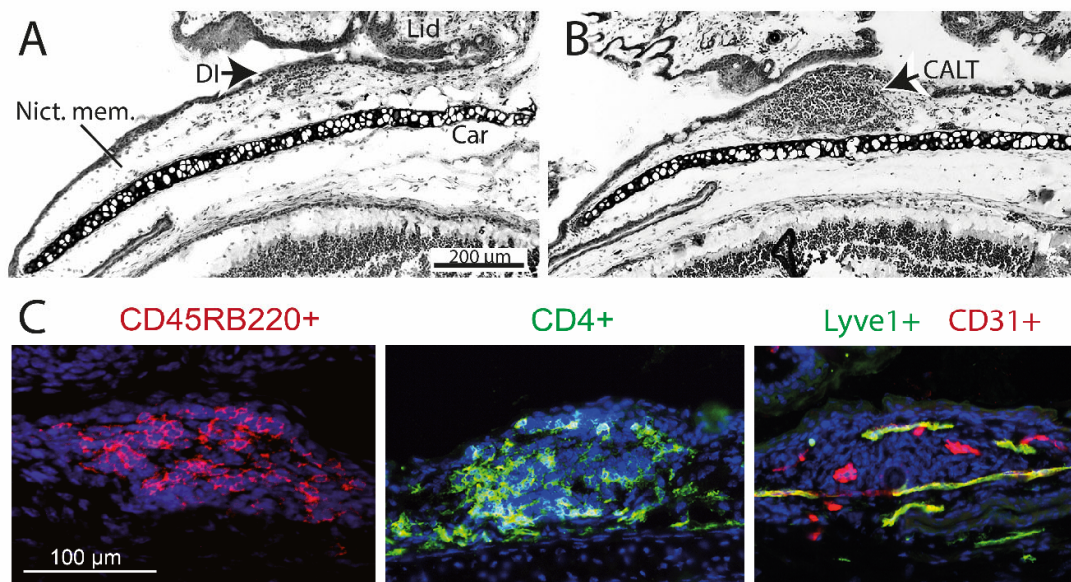

**Supplemental Figure S2:** Representative images depicting the criteria for the definition of CALT. In contrast to (A) diffuse cellular infiltrations, (B) follicles are defined as condensed accumulation of cells, containing a central B- cell and T cell zone, with surrounding blood vessels and lymphatics. **A+B)** Nictitating membrane in OVA/CtB stimulated mice (toluidine staining). Outside the CALT follicles only few cells are present. For FACS only the nictitating membrane tissue was harvested, digested and further analyzed. **C)** Immunohistochemistry of a CALT follicle show CD45RB220+ B cells (red), CD4+ T cells (green) and adjacent blood- (red) and lymph- (green) vessels. (Nict.mem.= nictitating membrane, Car = cartilage, DI = diffuse cellular infiltration).

**Supplemental Table S1: Antibody-panel used for immunohistology.**

| <b>Antibodies (clone)</b> | <b>Target</b>     | <b>Manufacturer</b> | <b>Catalog-no.</b> |
|---------------------------|-------------------|---------------------|--------------------|
| CD11c (N418)              | Dendritic Cells   | Acris Antibodies    | AM05514PU-L        |
| F4/80 (A3-1)              | Macrophages       | Invitrogen          | MA5.16630          |
| CD45RB220 (RA3-6B2)       | B-Cells           | BioLegend           | 103201             |
| CD11b (M1/70)             | Monocytes         | Acris Antibodies    | SM014A             |
| Pan-cytokeratin           | Epithelial Cells  | Novus Biologicals   | NB600-579          |
| CD4 (GK1.5), CD8 (53-6.7) | T-Cells           | eBioscience         | 14-0041; 14-0081   |
| CD31 (MEC13.3)            | Blood vessels     | BD Bioscience       | 553371             |
| Lyve1                     | Lymphatic vessels | Acris Antibodies    | DP3513             |
| MHC II (OX-6)             | APC               | BioOrbyt            | orb44830           |
| DAPI                      | Nuclei            | Sigma Aldrich       | D9542              |
